# Supplementary material for: Associations between psychosocial work factors and provider mental well-being in emergency departments: A systematic review
Source: PLoS One. 2018 Jun 4;13(6):e0197375. doi: 10.1371/journal.pone.0197375 (PMC5986127; doi:10.1371/journal.pone.0197375)
Supplement: S6 Table — Number before brackets: number of extracted associations; number within brackets: number of studies describing these associations. (XLSX) [file pone.0197375.s010.xlsx]

## Sheet: Harvest plot tables
All studies														Prozentuale Verteilung der starken, mittleren und schwachen Assoziationen pro well-being outcome (alle Studien)
Effect size	strong	medium	weak	strong	medium	weak	strong	medium	weak	strong	medium	weak		Effect size	strong	medium	weak	strong	medium	weak	strong	medium	weak	strong	medium	weak
	Unadjusted estimates			Unadjusted estimates			Unadjusted estimates			Unadjusted estimates					Unadjusted estimates			Unadjusted estimates			Unadjusted estimates			Unadjusted estimates
Outcome	Positive Well-being at work			Affective symptoms/ Neg. psych. functioning			Cognitive-behavioral outcomes			Health complaints				Outcome	Positive Well-being at work			Affective symptoms/ Neg. psych. functioning			Cognitive-behavioral outcomes			Health complaints
Patient/ task	2 (2)	17 (8)	24 (9)	16 (7)	21 (12)	43 (14)	0 (0)	4 (2)	9 (4)	0 (0)	1 (1)	14 (5)		Patient/ task	0.0465116	0.395349	0.55814	0.2	0.2625	0.5375	0	0.307692	0.692308	0	0.0666667	0.933333
Organizational	4 (1)	13 (6)	22 (7)	4 (2)	15 (4)	31 (7)	2 (1)	11 (2)	17 (5)	0 (0)	2 (1)	3 (2)		Organizational	0.102564	0.333333	0.564103	0.08	0.3	0.62	0.0666667	0.366667	0.566667	0	0.4	0.6
Social	3 (3)	10 (5)	11 (5)	6 (2)	21 (10)	16 (7)	0 (0)	0 (0)	4 (2)	0 (0)	2 (1)	10 (3)		Social	0.125	0.416667	0.458333	0.139535	0.488372	0.372093	0	0	1	0	0.166667	0.833333
General	0 (0)	1 (1)	2 (2)	0 (0)	5 (3)	0 (0)	0 (0)	0 (0)	1 (1)	0 (0)	0 (0)	0 (0)		General
	Adjusted estimates			Adjusted estimates			Adjusted estimates			Adjusted estimates					Adjusted estimates			Adjusted estimates			Adjusted estimates			Adjusted estimates
Outcome	Positive Well-being at work			Affective symptoms/ Neg. psych. functioning			Cognitive-behavioral outcomes			Health complaints				Outcome	Positive Well-being at work			Affective symptoms/ Neg. psych. functioning			Cognitive-behavioral outcomes			Health complaints
Patient/ task	6 (5)	9 (7)	32 (11)	15 (8)	10 (8)	49 (12)	1 (1)	1 (1)	10 (4)	1 (1)	3 (1)	13 (3)		Patient/ task	0.12766	0.191489	0.680851	0.202703	0.135135	0.662162	0.0833333	0.0833333	0.833333	0.0588235	0.176471	0.764706
Organizational	7 (4)	9 (4)	33 (7)	14 (4)	4 (4)	17 (6)	2 (2)	1 (1)	23 (6)	0 (0)	0 (0)	4 (1)		Organizational	0.142857	0.183673	0.673469	0.4	0.114286	0.485714	0.0769231	0.0384615	0.884615	0	0	1
Social	2 (2)	4 (4)	22 (10)	7 (4)	6 (4)	35 (13)	1 (1)	1 (1)	5 (3)	0 (0)	4 (2)	11 (3)		Social	0.0714286	0.142857	0.785714	0.145833	0.125	0.729167	0.142857	0.142857	0.714286	0	0.266667	0.733333
General	0 (0)	0 (0)	0 (0)	0 (0)	0 (0)	1 (1)	0 (0)	0 (0)	1 (1)	1 (1)	5 (1)	0 (0)		General
Nurses
														Prozentuale Verteilung der starken, mittleren und schwachen Assoziationen pro well-being outcome (nur Pflege)
Effect size	strong	medium	weak	strong	medium	weak	strong	medium	weak	strong	medium	weak		Effect size	strong	medium	weak	strong	medium	weak	strong	medium	weak	strong	medium	weak
	Unadjusted estimates			Unadjusted estimates			Unadjusted estimates			Unadjusted estimates					Unadjusted estimates			Unadjusted estimates			Unadjusted estimates			Unadjusted estimates
Outcome	Positive Well-being at work			Affective symptoms/ Neg. psych. functioning			Cognitive-behavioral outcomes			Health complaints				Outcome	Positive Well-being at work			Affective symptoms/ Neg. psych. functioning			Cognitive-behavioral outcomes			Health complaints
Patient/ task	1 (1)	7 (3)	12 (5)	5 (2)	6 (5)	20 (7)	0 (0)	1 (1)	5 (2)	0 (0)	0 (0)	7 (2)		Patient/ task	0.05	0.35	0.6	0.16129	0.193548	0.645161	0	0.166667	0.833333	0	0	1
Organizational	4 (1)	9 (3)	11 (4)	0 (0)	3 (2)	21 (4)	2 (1)	11 (2)	7 (3)	0 (0)	2 (1)	2 (1)		Organizational	0.166667	0.375	0.458333	0	0.125	0.875	0.1	0.55	0.35	0	0.5	0.5
Social	1 (1)	7 (2)	8 (3)	0 (0)	8 (5)	13 (5)	0 (0)	0 (0)	4 (2)	0 (0)	0 (0)	8 (2)		Social	0.0625	0.4375	0.5	0	0.380952	0.619048	0	0	1	0	0	1
General	0 (0)	0 (0)	2 (2)	0 (0)	5 (3)	0 (0)	0 (0)	0 (0)	0 (0)	0 (0)	0 (0)	0 (0)
	Adjusted estimates			Adjusted estimates			Adjusted estimates			Adjusted estimates					Adjusted estimates			Adjusted estimates			Adjusted estimates			Adjusted estimates
Outcome	Positive Well-being at work			Affective symptoms/ Neg. psych. functioning			Cognitive-behavioral outcomes			Health complaints				Outcome	Positive Well-being at work			Affective symptoms/ Neg. psych. functioning			Cognitive-behavioral outcomes			Health complaints
Patient/ task	3 (3)	5 (4)	20 (6)	8 (3)	4 (4)	23 (6)	0 (0)	1 (1)	10 (4)	1 (1)	3 (1)	7 (2)		Patient/ task	0.107143	0.178571	0.714286	0.228571	0.114286	0.657143	0	0.0909091	0.909091	0.0909091	0.272727	0.636364
Organizational	4 (2)	2 (1)	26 (5)	6 (1)	1 (1)	12 (2)	1 (1)	0 (0)	13 (3)	0 (0)	0 (0)	4 (1)		Organizational	0.125	0.0625	0.8125	0.315789	0.0526316	0.631579	0.0714286	0	0.928571	0	0	1
Social	1 (1)	2 (2)	14 (6)	4 (1)	4 (3)	16 (7)	0 (0)	0 (0)	5 (3)	0 (0)	3 (1)	8 (2)		Social	0.0588235	0.117647	0.823529	0.166667	0.166667	0.666667	0	0	1	0	0.272727	0.727273
General	0 (0)	0 (0)	0 (0)	0 (0)	0 (0)	1 (1)	0 (0)	0 (0)	1 (1)	1 (1)	5 (1)	0 (0)
Physicians
														Prozentuale Verteilung der starken, mittleren und schwachen Assoziationen pro well-being outcome (nur Ärzte)
Effect size	strong	medium	weak	strong	medium	weak	strong	medium	weak	strong	medium	weak		Effect size	strong	medium	weak	strong	medium	weak	strong	medium	weak	strong	medium	weak
	Unadjusted estimates			Unadjusted estimates			Unadjusted estimates			Unadjusted estimates					Unadjusted estimates			Unadjusted estimates			Unadjusted estimates			Unadjusted estimates
Outcome	Positive Well-being at work			Affective symptoms/ Neg. psych. functioning			Cognitive-behavioral outcomes			Health complaints				Outcome	Positive Well-being at work			Affective symptoms/ Neg. psych. functioning			Cognitive-behavioral outcomes			Health complaints
Patient/ task	1 (1)	4 (3)	7 (2)	6 (3)	11 (4)	18 (4)	0 (0)	0 (0)	4 (2)	0 (0)	1 (1)	7 (3)		Patient/ task	0.0833333	0.333333	0.583333	0.171429	0.314286	0.514286	0	0	1	0	0.125	0.875
Organizational	0 (0)	4 (3)	11 (3)	4 (2)	12 (2)	8 (2)	0 (0)	0 (0)	9 (2)	0 (0)	0 (0)	1 (1)		Organizational	0	0.266667	0.733333	0.166667	0.5	0.333333	0	0	1	0	0	1
Social	2 (2)	3 (3)	1 (1)	4 (1)	10 (3)	2 (1)	0 (0)	0 (0)	0 (0)	0 (0)	2 (1)	2 (1)		Social	0.333333	0.5	0.166667	0.25	0.625	0.125				0	0.5	0.5
General	0 (0)	1 (1)	0 (0)	0 (0)	0 (0)	0 (0)	0 (0)	0 (0)	1 (1)	0 (0)	0 (0)	0 (0)
	Adjusted estimates			Adjusted estimates			Adjusted estimates			Adjusted estimates					Adjusted estimates			Adjusted estimates			Adjusted estimates			Adjusted estimates
Outcome	Positive Well-being at work			Affective symptoms/ Neg. psych. functioning			Cognitive-behavioral outcomes			Health complaints				Outcome	Positive Well-being at work			Affective symptoms/ Neg. psych. functioning			Cognitive-behavioral outcomes			Health complaints
Patient/ task	3 (2)	2 (1)	8 (4)	5 (4)	4 (3)	13 (4)	1 (1)	0 (0)	0 (0)	0 (0)	0 (0)	6 (1)		Patient/ task	0.230769	0.153846	0.615385	0.227273	0.181818	0.590909	1	0	0	0	0	1
Organizational	3 (2)	6 (2)	4 (1)	8 (3)	3 (3)	3 (3)	0 (0)	1 (1)	1 (1)	0 (0)	0 (0)	0 (0)		Organizational	0.230769	0.461538	0.307692	0.571429	0.214286	0.214286	0	0.5	0.5
Social	1 (1)	2 (2)	6 (4)	2 (2)	1 (1)	11 (4)	1 (1)	1 (1)	0 (0)	0 (0)	1 (1)	3 (1)		Social	0.111111	0.222222	0.666667	0.142857	0.0714286	0.785714	0.5	0.5	0	0	0.25	0.75
General	0 (0)	0 (0)	0 (0)	0 (0)	0 (0)	0 (0)	0 (0)	0 (0)	0 (0)	0 (0)	0 (0)	0 (0)
Mixed samples
Effect size	strong	medium	weak	strong	medium	weak	strong	medium	weak	strong	medium	weak
	Unadjusted estimates			Unadjusted estimates			Unadjusted estimates			Unadjusted estimates
Outcome	Positive Well-being at work			Affective symptoms/ Neg. psych. functioning			Cognitive-behavioral outcomes			Health complaints
Patient/ task	0 (0)	6 (2)	5 (2)	5 (2)	4 (3)	5 (3)	0 (0)	3 (1)	0 (0)	0 (0)	0 (0)	0 (0)
Organizational	0 (0)	0 (0)	0 (0)	0 (0)	0 (0)	2 (1)	0 (0)	0 (0)	0 (0)	0 (0)	0 (0)	0 (0)
Social	0 (0)	0 (0)	2 (1)	2 (1)	3 (2)	1 (1)	0 (0)	0 (0)	0 (0)	0 (0)	0 (0)	0 (0)
General	0 (0)	0 (0)	0 (0)	0 (0)	0 (0)	0 (0)	0 (0)	0 (0)	0 (0)	0 (0)	0 (0)	0 (0)
	Adjusted estimates			Adjusted estimates			Adjusted estimates			Adjusted estimates
Outcome	Positive Well-being at work			Affective symptoms/ Neg. psych. functioning			Cognitive-behavioral outcomes			Health complaints
Patient/ task	0 (0)	2 (2)	4 (2)	2 (2)	2 (2)	13 (3)	0 (0)	0 (0)	0 (0)	0 (0)	0 (0)	0 (0)
Organizational	0 (0)	1 (1)	3 (1)	0 (0)	0 (0)	2 (1)	1 (1)	0 (0)	9 (2)	0 (0)	0 (0)	0 (0)
Social	0 (0)	0 (0)	2 (1)	1 (1)	1 (1)	8 (3)	0 (0)	0 (0)	0 (0)	0 (0)	0 (0)	0 (0)
General	0 (0)	0 (0)	0 (0)	0 (0)	0 (0)	0 (0)	0 (0)	0 (0)	0 (0)	0 (0)	0 (0)	0 (0)
